# Supplementary material for: Novel Approach to Risk Stratification in Left Ventricular Non‐Compaction Using A Combined Cardiac Imaging and Plasma Biomarker Approach
Source: PubMed Central journal article supplement — J Am Heart Assoc. 2021 Apr 9;10(8):e019209. doi: 10.1161/JAHA.120.019209 (PMC8174181; doi:10.1161/jaha.120.019209), 2021-04-09
Supplement: JAH3-10-e019209-s001.pdf [file JAH3-10-e019209-s001.pdf]

# **Supplemental Material**

**Table S1. Results of Multivariable Models with LVEDVi.**

|                                        | Independent Variables                                                                                                                                                                                                                                                                                                           | Estimated HRs (p-value)                                                                                                                                                       |
|----------------------------------------|---------------------------------------------------------------------------------------------------------------------------------------------------------------------------------------------------------------------------------------------------------------------------------------------------------------------------------|-------------------------------------------------------------------------------------------------------------------------------------------------------------------------------|
| Model 1: Full main effects             | Medical risk score<br>LVEDVi<br>LAVI<br>Abrupt thinning<br>Maximal T/ C ratio<br>T/C ratio >3:1 in segments 1–3, 7–16<br>Basal to mid septal hypertrabeculation<br>Basal to mid anterior hypertrabeculation<br>Basal to mid inferior hypertrabeculation<br>Basal to mid lateral hypertrabeculation<br>Apical hypertrabeculation | 2.19 (<0.001)<br>1.00 (0.100)<br>1.01 (0.169)<br>1.55 (0.097)<br>0.95 (0.696)<br>1.39 (0.246)<br>1.15 (0.693)<br>1.46 (0.264)<br>1.47 (0.234)<br>0.82 (0.443)<br>0.57 (0.094) |
| Model 2: Reduced main effects          | Medical risk score<br>Abrupt thinning<br>LAVI                                                                                                                                                                                                                                                                                   | 2.27 (<0.001)<br>1.87 (adjusted 0.012)<br>1.01 (adjusted 0.029)                                                                                                               |
| Model 3: Reduced main effects with BNP | Medical risk score<br>Abrupt thinning<br>LAVI<br>Elevated BNP                                                                                                                                                                                                                                                                   | 2.08 (<0.001)<br>1.88 (adjusted 0.020)<br>1.01 (adjusted 0.374)<br>3.12 (adjusted 0.015)                                                                                      |
| Model 4: Reduced main effects with LGE | Medical risk score<br>Abrupt thinning<br>LAVI_MRI<br>LGE                                                                                                                                                                                                                                                                        | 2.25 (<0.001)<br>1.64 (adjusted 0.123)<br>1.01 (adjusted 0.188)<br>1.20 (adjusted 0.442)                                                                                      |
| Model 5: Final Model                   | Medical risk score<br>Abrupt thinning<br><br>Elevated BNP                                                                                                                                                                                                                                                                       | 2.11 (<0.001) [95% CI: 1.57, 2.83]<br>1.93 (adjusted 0.006) [95% CI: 1.21, 3.09]<br><br>3.53 (adjusted 0.002) [95% CI: 1.64, 7.57]                                            |

BNP: brain natriuretic peptide; LAVI: left atrial volume index; LGE: late gadolinium enhancement; LV: Left ventricular; LVEDVi: left ventricular end diastolic volume index; NC/C: Trabeculated / compacted RV: right ventricular

Figure S1. Flow diagram demonstrating derivation of study cohort.

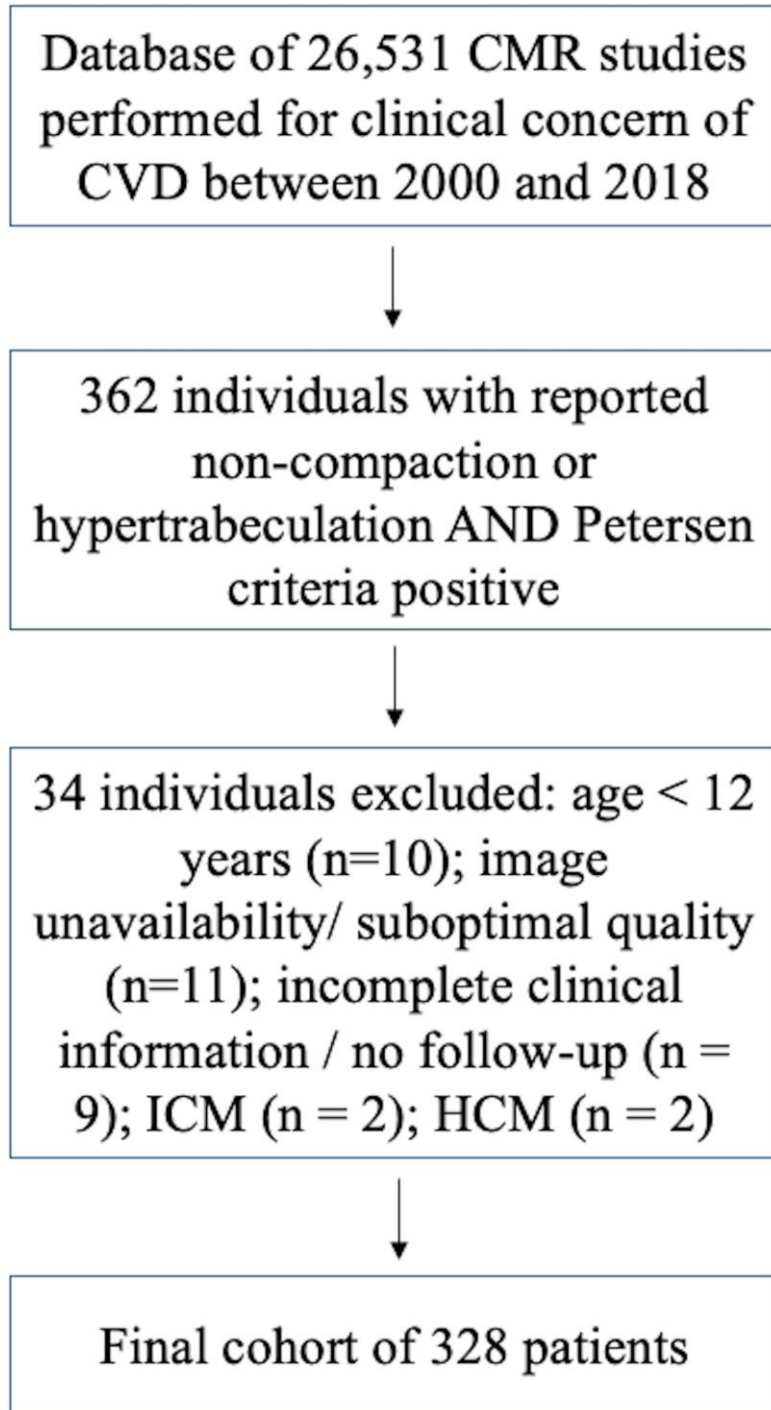

CMR: cardiac magnetic resonance; CVD: cardiovascular disease; ICM: ischemic cardiomyopathy; hypertrophic cardiomyopathy,

Figure S2. Example of medical risk calculation.

|                           | Score Components |
|---------------------------|------------------|
| Age $\geq$ 50?            | +1.9             |
| Male gender?              | -11.7            |
| Diabetes ?                | -50.8            |
| Atrial arrhythmias?       | +56.3            |
| History of heart failure? | +141.9           |
| Systemic Embolization?    | +74.8            |
| LBBB or RBBB?             | +70.3            |

**Example:** 58-year-old female with LBBB and a history of heart failure:

$$\text{Score}^* = 1.9 + 141.9 + 70.3 = 214.1$$

\*Note: This is a score indicating relative (not absolute) medical risk of MACE.

LBBB: left bundle branch block; MACE = major adverse cardiovascular events, RBBB: right bundle branch block
